# Supplementary material for: Fast and Sensitive Detection of Soil-Borne Cereal Mosaic Virus in Leaf Crude Extract of Durum Wheat
Source: MDPI journal article supplement (doi:10.3390/v15010140), 2022-12-31

**Figure S1.**

LAMP temperature gradient tests from 60 to 65°C, performed on cDNAs from SBCMV-infected wheat plants. Experiment performed in the CFX instrument. Green = SBCMV positive control; violet = negative control; blue = no template (water); RFU= Relative fluorescence units

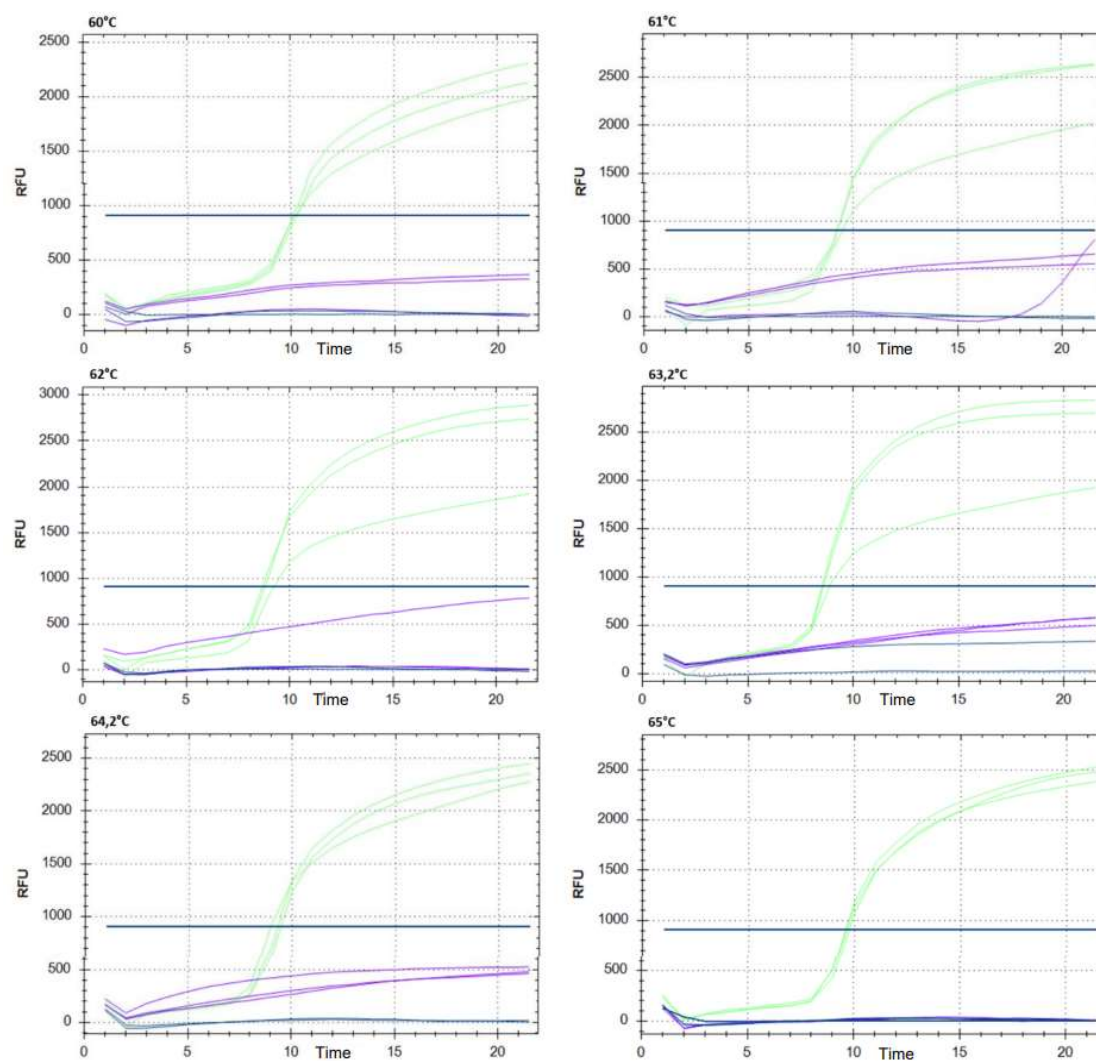

Supplement: s1 [file s1]
